# Supplementary material
Source: PubMed Central journal article supplement (PMC3811354)
Supplement: AEM.01740-13_zam999104734so1.pdf [file AEM.01740-13_zam999104734so1.pdf]

**TABLE S1** Sequence Type Distribution of 139 CTX-M-producing *E. coli* isolates from different sources

| Clonal complex | ST   | Number of isolates |            |                |                      |               | Phylogenetic group |
|----------------|------|--------------------|------------|----------------|----------------------|---------------|--------------------|
|                |      | Water (n=26)       | Pig (n=31) | Patient (n=36) | Healthy human (n=46) | Total (n=139) |                    |
| 10             | 10   | 3                  | 7          | 1              | 3                    | 14            | A                  |
|                | 48   |                    | 2          |                |                      | 2             | A                  |
|                | 617  | 1                  | 1          |                |                      | 2             | A                  |
|                | 43   |                    |            |                | 1                    | 1             | A                  |
| 23             | 23   | 1                  |            |                | 1                    | 2             | A                  |
|                | 410  |                    |            | 1              |                      | 1             | A                  |
|                | 88   |                    | 1          |                |                      | 1             | A                  |
| 86             | 641  |                    | 2          |                |                      | 2             | B1                 |
|                | 453  |                    |            |                | 1                    | 1             | B1                 |
| 101            | 101  |                    | 2          |                |                      | 2             | B1                 |
| 168            | 93   | 1                  |            |                | 1                    | 2             | A                  |
| 177            | 155  | 1                  |            |                |                      | 1             | B1                 |
| 354            | 354  |                    |            | 1              | 1                    | 2             | D                  |
| 38             | 38   | 4                  |            | 3              | 9                    | 16            | D                  |
| 40             | 40   |                    |            | 1              |                      | 1             | B1                 |
| 405            | 405  | 2                  | 1          | 2              | 1                    | 6             | D                  |
| 46             | 46   |                    | 1          | 1              |                      | 2             | A                  |
| 95             | 95   |                    |            | 1              | 1                    | 2             | B2                 |
| 205            | 205  | 2                  |            |                |                      | 2             | D                  |
| 226            | 226  |                    |            |                | 2                    | 2             | A                  |
| 69             | 69   |                    |            |                | 1                    | 1             | D                  |
| 398            | 398  |                    | 1          |                |                      | 1             | A                  |
| 649            | 162  |                    | 1          |                |                      | 1             | D                  |
|                | 62   |                    |            |                | 2                    | 2             | D                  |
|                | 117  |                    | 2          |                |                      | 2             | D                  |
|                | 131  | 4                  |            | 10             | 6                    | 20            | B2                 |
|                | 295  | 1                  |            |                |                      | 1             | B1                 |
|                | 361  |                    | 1          |                |                      | 1             | B2                 |
|                | 457  |                    |            | 2              |                      | 2             | D                  |
|                | 648  | 3                  |            | 7              | 9                    | 19            | D                  |
|                | 697  |                    |            |                | 1                    | 1             | A                  |
|                | 744  |                    |            | 1              | 1                    | 2             | A                  |
|                | 746  |                    |            |                | 1                    | 1             | A                  |
|                | 773  |                    |            |                | 1                    | 1             | A                  |
|                | 1081 |                    | 1          |                |                      | 1             | B1                 |
|                | 1112 |                    | 1          |                |                      | 1             | A                  |
|                | 1193 |                    |            | 3              |                      | 3             | B2                 |
|                | 1196 |                    | 1          |                |                      | 1             | B1                 |

|     |      |   |   |   |  |   |    |
|-----|------|---|---|---|--|---|----|
|     | 1684 |   |   | 1 |  | 1 | A  |
|     | 2003 |   | 2 |   |  | 2 | D  |
|     | 2035 | 1 |   |   |  | 1 | A  |
|     | 2345 | 1 |   |   |  | 1 | B2 |
|     | 3136 | 1 |   |   |  | 1 | B2 |
|     | 3177 |   |   | 1 |  | 1 | D  |
| New | 3484 | 1 |   |   |  | 1 | B2 |
| New | 3485 | 1 |   |   |  | 1 | D  |
| New | 3724 |   |   | 1 |  | 1 | B2 |
| New | 3725 | 1 |   |   |  | 1 | A  |
| New | 3744 | 1 |   |   |  | 1 | A  |
| New | 3745 | 1 |   |   |  | 1 | A  |
| New | 3746 | 1 |   |   |  | 1 | B1 |

**TABLE S2** Distribution of CTX-M subgroups among 139 *E. coli* isolates from different sources

| CTX-M type    | Number of isolates              |                               |                                   |                                         |                                  | Phylogenetic group |
|---------------|---------------------------------|-------------------------------|-----------------------------------|-----------------------------------------|----------------------------------|--------------------|
|               | Water<br>(n=26+2 <sup>a</sup> ) | Pig<br>(n=31+1 <sup>a</sup> ) | Patient<br>(n=36+3 <sup>a</sup> ) | Healthy human<br>(n=46+1 <sup>a</sup> ) | Total<br>(n=139+7 <sup>a</sup> ) |                    |
| CTX-M-9 group | 16                              | 21                            | 27                                | 42                                      | 106                              | A,B1,B2,D          |
| CTX-M-14      | 11                              | 9                             | 21                                | 34                                      | 75                               | A,B1,B2,D          |
| CTX-M-24      |                                 | 2                             | 2                                 | 3                                       | 7                                | A,B1,B2,D          |
| CTX-M-27      | 1                               | 1                             | 3                                 | 2                                       | 7                                | A, B2,D            |
| CTX-M-65      | 4                               | 5                             | 1                                 | 3                                       | 13                               | A,B1,B2,D          |
| CTX-M-98      |                                 | 2                             |                                   |                                         | 2                                | A                  |
| CTX-M-104     |                                 | 1                             |                                   |                                         | 1                                | D                  |
| CTX-M-121     |                                 | 1                             |                                   |                                         | 1                                | B2                 |
| CTX-M-1 group | 12                              | 11                            | 12                                | 5                                       | 40                               | A,B1,B2,D          |
| CTX-M-3       | 1                               |                               | 1                                 | 1                                       | 3                                | A,D                |
| CTX-M-15      | 6                               |                               | 4                                 | 2                                       | 12                               | A, B2,D            |
| CTX-M-55      | 5                               | 11                            | 6                                 | 2                                       | 24                               | A,B1,B2,D          |
| CTX-M-123     |                                 |                               | 1                                 |                                         | 1                                | A                  |

<sup>a</sup>: these isolates harbors both CTX-M-9 group and CTX-M-1 group ESBLs.

**TABLE S3** Resistance rates of ESBLs-producing *E. coli* isolates and *p* values of various classifications<sup>a</sup>

| Antimicrobial agents   | water isolates<br>(N=26) | healthy human<br>(N=46) | <i>p</i> <sup>b</sup> | pig feces<br>(N=31) | hospitalized patients<br>(N=36) | <i>p</i>     | hospitalized patients<br>(N=36) | healthy human<br>(N=46) | <i>p</i>     |
|------------------------|--------------------------|-------------------------|-----------------------|---------------------|---------------------------------|--------------|---------------------------------|-------------------------|--------------|
| ceftazidime            | 34.6                     | 6.5                     | <b>0.006</b>          | 16.1                | 47.2                            | <b>0.009</b> | 47.2                            | 6.5                     | <b>0.000</b> |
| aztreonam              | 69.2                     | 19.6                    | <b>0.000</b>          | 61.3                | 78.4                            | 0.184        | 78.4                            | 19.6                    | <b>0.000</b> |
| cefoxitin              | 19.2                     | 0.0                     | <b>0.005</b>          | 0.0                 | 11.1                            | 0.118        | 11.1                            | 0.0                     | 0.034        |
| cefepime               | 19.2                     | 4.3                     | 0.090                 | 9.7                 | 47.2                            | <b>0.001</b> | 47.2                            | 4.3                     | <b>0.000</b> |
| levofloxacin           | 76.9                     | 37.0                    | <b>0.001</b>          | 48.4                | 88.9                            | <b>0.000</b> | 88.9                            | 37.0                    | <b>0.000</b> |
| moxifloxacin           | 76.9                     | 41.3                    | <b>0.006</b>          | 48.4                | 88.9                            | <b>0.000</b> | 88.9                            | 41.3                    | <b>0.000</b> |
| cefoperazone/sulbactam | 15.4                     | 4.3                     | 0.180                 | 3.2                 | 41.7                            | <b>0.000</b> | 41.7                            | 4.3                     | <b>0.000</b> |
| ciprofloxacin          | 76.9                     | 41.3                    | <b>0.006</b>          | 48.4                | 88.9                            | <b>0.000</b> | 88.9                            | 41.3                    | <b>0.000</b> |

**TABLE S3** Resistance rates of ESBLs-producing *E. coli* isolates and *p* values of various classifications (**continued table**)

| Antimicrobial agents | ST131<br>(N=20) | ST38<br>(N=16) | <i>p</i>     | ST648<br>(N=19) | ST38<br>(N=16) | <i>p</i>     | ST10<br>cplx<br>(N=19) | ST38<br>(N=16) | <i>p</i>     |
|----------------------|-----------------|----------------|--------------|-----------------|----------------|--------------|------------------------|----------------|--------------|
| aztreonam            | 65.0            | 18.8           | <b>0.008</b> | 31.6            | 18.8           | 0.460        | 63.2                   | 18.8           | 0.016        |
| levofloxacin         | 75.0            | 18.8           | <b>0.002</b> | 100.0           | 18.8           | <b>0.000</b> | 68.4                   | 18.8           | <b>0.006</b> |
| moxifloxacin         | 75.0            | 18.8           | <b>0.002</b> | 100.0           | 18.8           | <b>0.000</b> | 68.4                   | 18.8           | <b>0.006</b> |

|               |      |      |              |       |      |              |      |      |              |
|---------------|------|------|--------------|-------|------|--------------|------|------|--------------|
| ciprofloxacin | 75.0 | 18.8 | <b>0.002</b> | 100.0 | 18.8 | <b>0.000</b> | 68.4 | 18.8 | <b>0.006</b> |
|---------------|------|------|--------------|-------|------|--------------|------|------|--------------|

---

<sup>a</sup> $p < 0.01$ , the significant differences level. This table only shows the antibiotics with a significant difference, while the other antibiotics without significant differences were not included.
